# Supplementary material
Source: Springer Nature journal article supplement (https://www.springermedizin.de/resource/supplementary/13045_2013_313_MOESM3_ESM.pdf/9661120)
Supplement: MOESM3 [file 9661120]

# MAP (Mitogen Activated Protein) Kinases

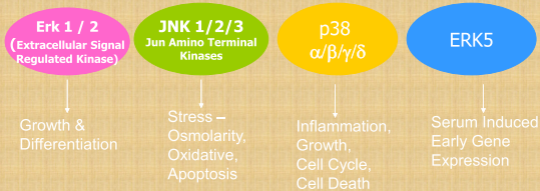

- Evolutionarily conserved Serine Threonine kinases
  - Dual phosphorylation site Thr-Xaa-Tyr
    - p38 MAPK has Thr-Gly-Tyr motif
